# Supplementary material for: The effect of chronotype (morningness/eveningness) on medical students' academic achievement in Sudan
Source: PubMed Central journal article supplement — J Taibah Univ Med Sci. 2017 Jun 13;12(6):512–6. doi: 10.1016/j.jtumed.2017.03.007 (PMC6695085; doi:10.1016/j.jtumed.2017.03.007), 2017-06-13
Supplement: mmc1.pdf [file mmc1.pdf]

**Chronotype (Eveningness/Morningness) and sleep quality questionnaire**

Age----- Sex-----Average of grades in the previous semester----- (A)---(C)

**Please record the following within two weeks and report the average:**

Average bedtime during working days-----

Average wake-up time during working days-----

Average bedtime during weekends -----

Average wake-up time during weekends-----

Average sleep duration during working days-----

Average sleep duration during weekends-----

Time in bed until falling asleep/minutes (sleep latency)-----

**Thank you**

Calculated bedtime lag between weekdays and weekends-----

Calculated wake-up lag between weekdays and weekends-----
